# Supplementary material for: Factors associated with treatment type of non-malarial febrile illnesses in under-fives at Kenyatta National Hospital in Nairobi, Kenya
Source: PubMed Central journal article supplement (PMC6563973; doi:10.1371/journal.pone.0217980), 2019-06-13
Supplement: pone.0217980.s001.pdf [file pone.0217980.s001.pdf]

## Non-Malarial Febrile Illness Clinical Assessment Questionnaire

### **A. DIAGNOSIS**

*(Indicate Yes/No in box if Assessment element is noted in the medical records. Circle whether patient is M/F)*

| <b>Assessment Element</b>                                                                                                                                                     | <b>Patient M/F</b> |
|-------------------------------------------------------------------------------------------------------------------------------------------------------------------------------|--------------------|
| 1. What is the age of the patient at assessment? (<1, 1, 2, 3, 4, 5)                                                                                                          |                    |
| 2. Are there notes to indicate the time since onset of fever was noted?                                                                                                       |                    |
| 3. Are there notes to indicate if childhood immunization card was assessed?                                                                                                   |                    |
| 4. Are there notes to indicate if temperature was taken? (If no, or <38°C then exclude)                                                                                       |                    |
| 5. Are there notes to indicate if danger signs were assessed? At least 3 main symptoms assessed and noted (cough, diarrhoea, fever, ear problem). If less than 3 indicate No. |                    |
| 6. Are there notes to indicate presence or absence of respiratory distress (Stridor, severe chest in-drawing, subcostal retractions or grunting)? If less than 3 indicate No. |                    |
| 7. Are there notes to indicate child was assessed for pallor, jaundice, oedema, sunken eyes or dehydration? If less than 3 indicate No.                                       |                    |
| 8. Are there notes to indicate child was assessed for lethargy, prostration, unconsciousness or either irritability and restlessness?                                         |                    |

### **B. TREATMENT**

| <b>Assessment Element</b>                                                                           |  |
|-----------------------------------------------------------------------------------------------------|--|
| 1. Was the child correctly prescribed an antimalarial after a positive microscopy result?           |  |
| 2. Is it verified that the child with a negative microscopy result did not receive an antimalarial? |  |

### **C. OUTCOME**

|                                                      |  |
|------------------------------------------------------|--|
| 1. Is the patient deceased at the time of discharge? |  |
|------------------------------------------------------|--|
